# Supplementary material
Source: Royal Society of Chemistry journal article supplement (doi:10.1039/d6qi00728g)
Supplement: d6qi00728g1.pdf [file d6qi00728g1.pdf]

## Electronic Supporting Information for:

### Deciphering the Excited State Landscape of Cr(III) *Tris*(diimines) Using [Cr(phen)<sub>3</sub>]<sup>3+</sup>

Alexandra T. Barth,<sup>1†</sup> Dilara Farkhutdinova,<sup>2,3†</sup> Adrienne P. Faulkner,<sup>1</sup> Irene Y. Dzaye,<sup>1</sup>  
Jonathan P. Wheeler,<sup>1</sup> Leticia González,<sup>2\*</sup> and Felix N. Castellano<sup>1\*</sup>

<sup>1</sup>*Department of Chemistry, North Carolina State University, Raleigh, North Carolina, 27695-8204, United States.*

<sup>2</sup>*Institute of Theoretical Chemistry, Faculty of Chemistry, University of Vienna, Währinger Straße 17, 1090 Vienna, Austria*

<sup>3</sup>*Doctoral School in Chemistry (DosChem), University of Vienna, Währinger Straße 38, 1090 Vienna, Austria*

<sup>†</sup>Denotes equal authorship contribution

|                                                     |     |
|-----------------------------------------------------|-----|
| <b>1. Supporting Figures and Tables</b> .....       | S2  |
| <b>2. Synthesis and Characterization Data</b> ..... | S20 |
| <b>3. UV-Visible Spectroscopy</b> .....             | S21 |
| <b>4. Infrared Spectroscopy</b> .....               | S22 |
| <b>5. Electrochemistry Measurements</b> .....       | S24 |
| <b>6. Transient Absorption Spectroscopy</b> .....   | S25 |
| <b>7. Time-Resolved PL Emission</b> .....           | S27 |
| <b>8. Optimized Structures</b> .....                | S28 |

## 1. Supporting Figures and Tables

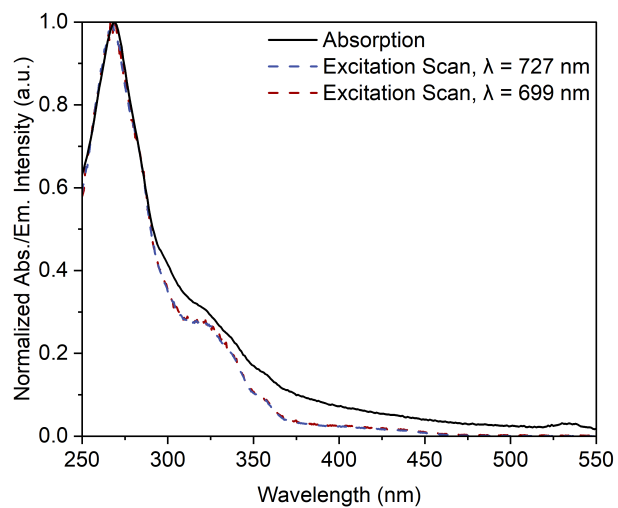

**Figure S1.** Normalized absorption and excitation scans from metal-centered  ${}^2E$  (727 nm) and  ${}^2T_1$  (699 nm) emission features in compound **1**. Measurements recorded at 295 K in  $\text{CH}_3\text{CN}$ .

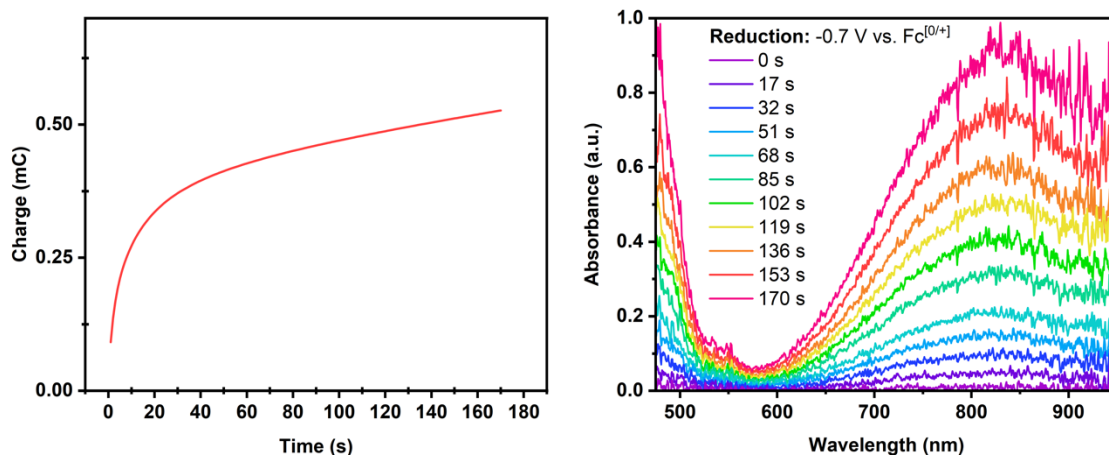

**Figure S2.** Spectroelectrochemistry data of compound **1** showing (left) the charge passed and (right) the change in spectral absorption profile during the first ligand-centered reduction event.

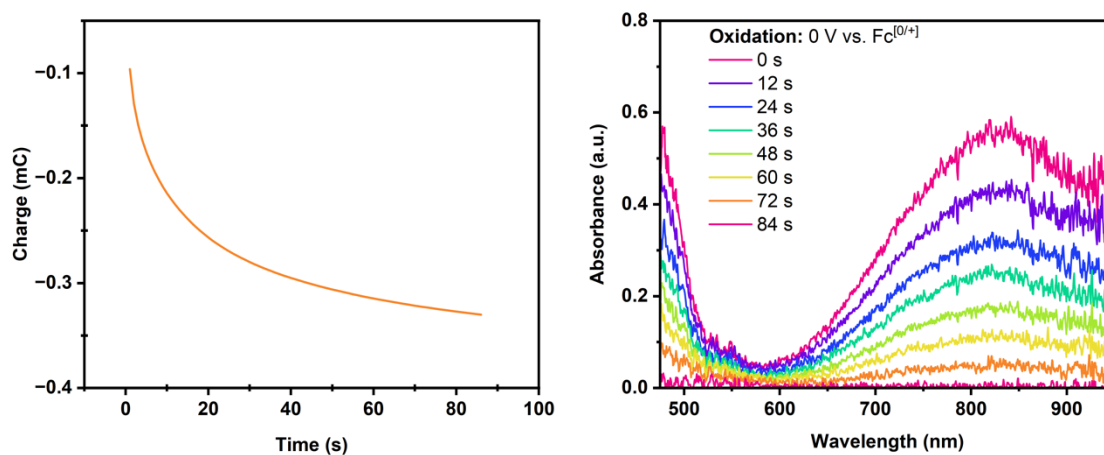

**Figure S3.** Spectroelectrochemistry data of compound **1** showing (left) the charge passed and (right) the change in spectral absorption profile during subsequent oxidation of this feature, demonstrating its electrochemical reversibility.

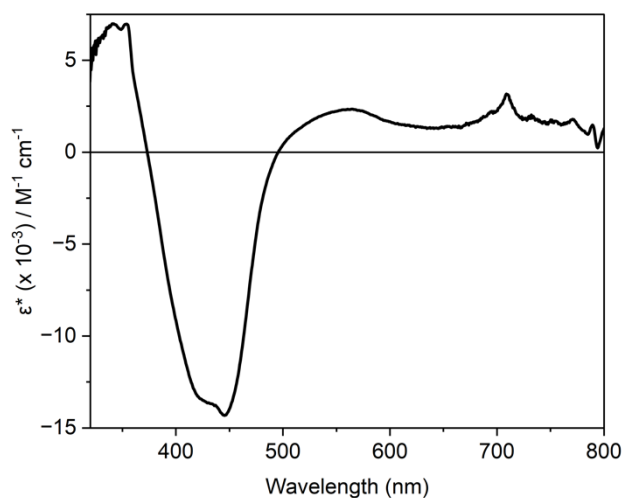

**Figure S4.** Visible excited state absorption difference spectrum of **2** ( $[\text{Ru}(\text{phen})_3](\text{PF}_6)_2$ ) monitored at 100 ps ( $\text{CH}_3\text{CN}$ ,  $\lambda_{\text{ex}} = 355 \text{ nm}$ ,  $P = 0.2 \mu\text{J}$ ). The excited state difference spectrum was scaled to an isoabsorbing sample of  $[\text{Ru}(\text{bpy})_3](\text{PF}_6)_2$  ( $\epsilon^*_{\text{GSB}, 450 \text{ nm}} = -1.13 \times 10^4 \text{ M}^{-1} \text{ cm}^{-1}$ ).<sup>1</sup> The feature at 710 nm is a second-order artifact from the 355 nm exciting light source.

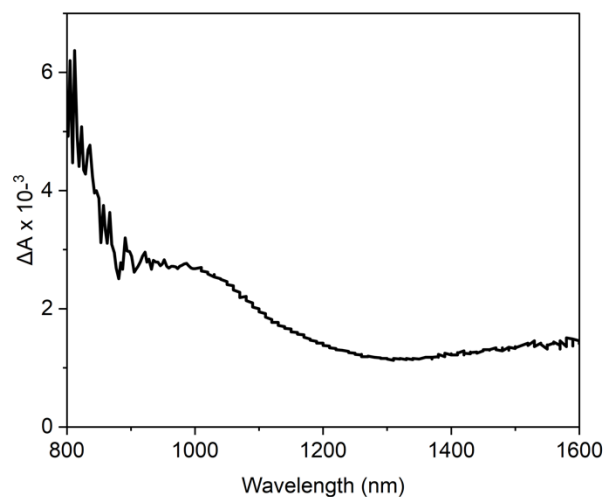

**Figure S5.** Near-IR excited state absorption difference spectrum of **2**  $[\text{Ru}(\text{phen})_3](\text{PF}_6)_2$  monitored at 100 ps ( $\text{CH}_3\text{CN}$ ,  $\lambda_{\text{ex}} = 355 \text{ nm}$ ,  $P = 0.2 \mu\text{J}$ ).

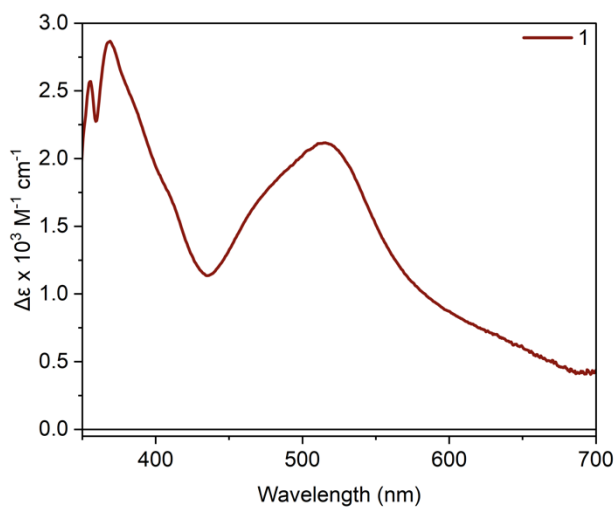

**Figure S6.** Excited state molar absorptivity of **1** in CH<sub>3</sub>CN monitored at 35 ps and referenced to the excited state spectrum of [Ru(bpy)<sub>3</sub>](PF<sub>6</sub>)<sub>2</sub> ( $\epsilon^*_{\text{GSB}, 448 \text{ nm}} = -1.13 \times 10^4 \text{ M}^{-1} \text{ cm}^{-1}$ ).<sup>2</sup>

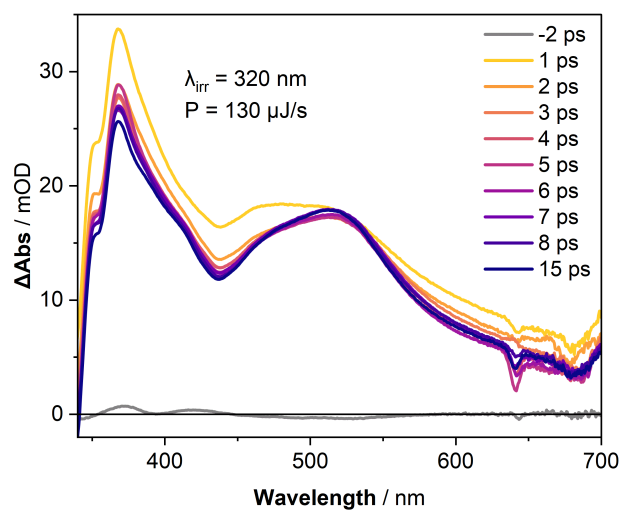

**Figure S7.** Transient absorption difference spectrum of **1** recorded in CH<sub>3</sub>CN following 320 nm excitation. The feature at 640 nm is a second-order artifact from the 320 nm exciting light source.

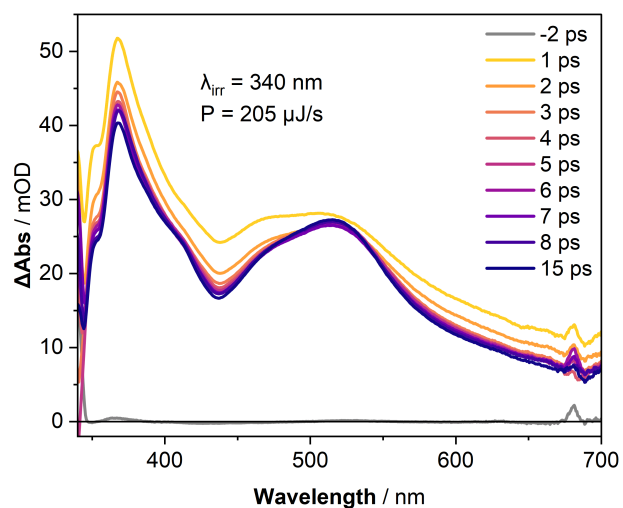

**Figure S8.** Transient absorption difference spectrum of compound **1** recorded in CH<sub>3</sub>CN following 340 nm excitation. The feature at 680 nm is a second-order artifact from the 340 nm exciting light source.

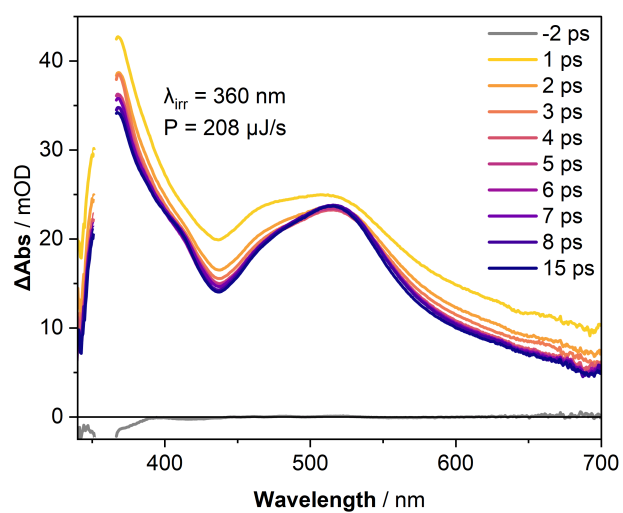

**Figure S9.** Transient absorption difference spectrum of compound **1** recorded in CH<sub>3</sub>CN following 360 nm excitation.

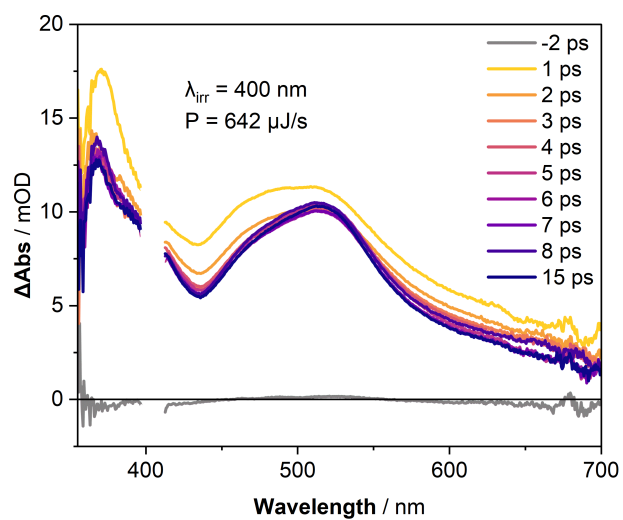

**Figure S10.** Transient absorption difference spectrum of **1** recorded in  $\text{CH}_3\text{CN}$  following 400 nm excitation.

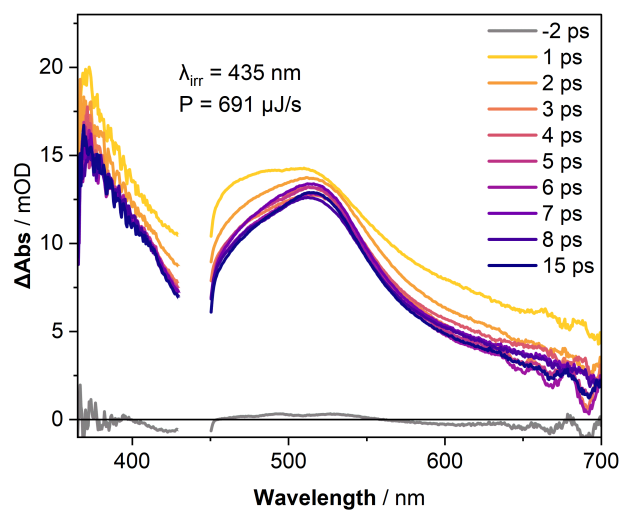

**Figure S11.** Transient absorption difference spectrum of compound **1** recorded in  $\text{CH}_3\text{CN}$  following 435 nm excitation.

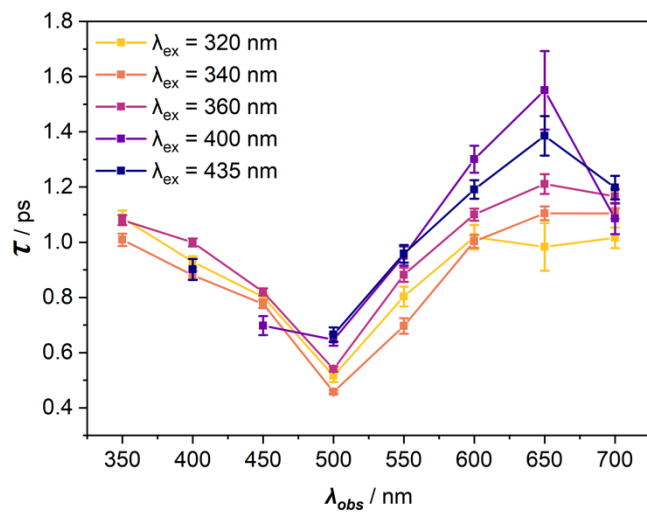

**Figure S12.** Changes in excited state time constants in **1** measured as a function of excitation wavelength, based on a monoexponential fit. These results match the trends observed by McCusker and coworkers.<sup>2</sup>

**Table S1.** Vibrational frequencies calculated at B3LYP/def2-SVP level of theory for the quartet ground state. Note that the first six vibrational modes correspond to the first three translational and three rotational degrees of freedom of the molecule and are expected to be close to zero. The structure is confirmed to be a local minimum because all remaining vibrational frequencies are positive

| Number | Frequency, cm <sup>-1</sup> | Intensity, km/mol |
|--------|-----------------------------|-------------------|
| 1      | 0                           | 0                 |
| 2      | 0                           | 0                 |
| 3      | 0                           | 0                 |
| 4      | 0                           | 0                 |
| 5      | 0                           | 0                 |
| 6      | 0                           | 0                 |
| 7      | 25,497346                   | 0,16724978        |
| 8      | 25,75534                    | 0,16686269        |
| 9      | 39,9528416                  | 0,14979067        |
| 10     | 40,33414                    | 0,02150099        |
| 11     | 40,4236467                  | 0,02239428        |
| 12     | 42,3552438                  | 0,00011878        |
| 13     | 86,1899495                  | 1,04844619        |
| 14     | 86,2603432                  | 1,05458138        |
| 15     | 92,1774404                  | 0,5018581         |
| 16     | 145,1144191                 | 0,00167972        |
| 17     | 161,6854601                 | 0,58785434        |
| 18     | 162,2214282                 | 0,52487482        |
| 19     | 165,7584631                 | 5,79461726        |
| 20     | 171,6934449                 | 0,01896661        |
| 21     | 171,9824981                 | 0,00335324        |
| 22     | 176,0384981                 | 0,00048679        |
| 23     | 189,7404059                 | 4,18278078        |
| 24     | 190,387474                  | 4,16076996        |
| 25     | 235,823488                  | 2,19671593        |
| 26     | 235,9014848                 | 2,26036744        |
| 27     | 239,7824161                 | 2,00732495        |
| 28     | 273,5414264                 | 0,24154825        |
| 29     | 273,676481                  | 0,23410151        |
| 30     | 283,6054687                 | 0,00016111        |

|    |             |             |
|----|-------------|-------------|
| 31 | 293,7924668 | 1,08193492  |
| 32 | 293,88347   | 1,07390407  |
| 33 | 301,8034368 | 0,00037014  |
| 34 | 343,9684001 | 6,59468545  |
| 35 | 354,1734642 | 30,34731904 |
| 36 | 354,5104005 | 30,26272634 |
| 37 | 427,4194188 | 0,08976086  |
| 38 | 427,5324279 | 0,09353765  |
| 39 | 436,1074628 | 0,00007927  |
| 40 | 441,4354227 | 0,00004372  |
| 41 | 447,7314849 | 17,05428153 |
| 42 | 447,9714872 | 17,33178012 |
| 43 | 456,4264443 | 0,02062479  |
| 44 | 464,6694014 | 9,85177729  |
| 45 | 464,7894548 | 9,74766776  |
| 46 | 496,8494528 | 0,08473279  |
| 47 | 496,8794806 | 0,08612365  |
| 48 | 499,25945   | 0,03708112  |
| 49 | 523,6104665 | 3,69018103  |
| 50 | 523,9714402 | 0,45136598  |
| 51 | 524,0114834 | 0,46047857  |
| 52 | 532,018444  | 1,19016976  |
| 53 | 535,0564286 | 0,26560099  |
| 54 | 535,1404658 | 0,27375506  |
| 55 | 559,6964617 | 0,03731299  |
| 56 | 559,7314456 | 0,0404647   |
| 57 | 562,2284666 | 0,00001243  |
| 58 | 572,4404501 | 0,00016655  |
| 59 | 573,6524024 | 0,11244307  |
| 60 | 573,7164669 | 0,11413705  |
| 61 | 629,4294757 | 0,02522866  |
| 62 | 629,4774322 | 0,02553856  |
| 63 | 634,3424756 | 0,00024622  |
| 64 | 667,3844163 | 3,53405205  |
| 65 | 667,449403  | 3,56840481  |
| 66 | 669,2794631 | 5,68929774  |
| 67 | 739,4554589 | 18,90782066 |
| 68 | 739,4664318 | 8,3510105   |
| 69 | 739,4764777 | 10,61771089 |

|     |             |             |
|-----|-------------|-------------|
| 70  | 746,5634234 | 43,07373163 |
| 71  | 748,2044341 | 47,20297311 |
| 72  | 748,2434777 | 46,40638881 |
| 73  | 756,529453  | 50,04197471 |
| 74  | 756,6444835 | 50,33153779 |
| 75  | 756,9304666 | 0,37346092  |
| 76  | 796,4064593 | 4,01713588  |
| 77  | 796,4564232 | 3,83169597  |
| 78  | 797,2324903 | 6,3198205   |
| 79  | 821,6314743 | 0,01535045  |
| 80  | 821,7054991 | 0,01641394  |
| 81  | 823,4784022 | 0,00199867  |
| 82  | 879,1864471 | 46,53514767 |
| 83  | 879,2364253 | 45,20469837 |
| 84  | 879,5824444 | 53,75630174 |
| 85  | 888,0424522 | 0,046278    |
| 86  | 888,1034527 | 0,05632636  |
| 87  | 888,945408  | 0,00131016  |
| 88  | 895,6494445 | 0,00108871  |
| 89  | 897,4224947 | 39,97128496 |
| 90  | 897,4804607 | 40,29519246 |
| 91  | 931,1854855 | 14,01757675 |
| 92  | 931,5434561 | 3,43752263  |
| 93  | 931,6074573 | 3,5783223   |
| 94  | 979,4404862 | 0,02124193  |
| 95  | 979,4854634 | 0,01437675  |
| 96  | 981,895467  | 0,02054281  |
| 97  | 982,5654976 | 5,17554867  |
| 98  | 982,6134743 | 5,23209208  |
| 99  | 984,8284597 | 3,80259372  |
| 100 | 1019,414856 | 0,00020859  |
| 101 | 1019,454826 | 0,00032428  |
| 102 | 1019,614966 | 0,00007553  |
| 103 | 1035,554861 | 0,57639644  |
| 104 | 1035,594399 | 0,56376582  |
| 105 | 1035,734508 | 0,5084964   |
| 106 | 1040,024815 | 0,00008433  |
| 107 | 1040,064023 | 0,0000633   |
| 108 | 1040,114351 | 0,00052897  |

|     |             |             |
|-----|-------------|-------------|
| 109 | 1060,274118 | 1,57077471  |
| 110 | 1063,604103 | 3,13041868  |
| 111 | 1063,624503 | 3,15578338  |
| 112 | 1091,514219 | 5,65739611  |
| 113 | 1091,604268 | 5,71556431  |
| 114 | 1092,374275 | 0,02120132  |
| 115 | 1120,394863 | 0,0150784   |
| 116 | 1120,454624 | 0,01647317  |
| 117 | 1123,204984 | 2,37539241  |
| 118 | 1135,674567 | 47,46382906 |
| 119 | 1135,704139 | 47,96255035 |
| 120 | 1138,344686 | 0,00073332  |
| 121 | 1174,62476  | 23,67619993 |
| 122 | 1174,724415 | 12,42793687 |
| 123 | 1174,814243 | 11,74003929 |
| 124 | 1180,114704 | 2,21238659  |
| 125 | 1180,244184 | 2,14225054  |
| 126 | 1180,284165 | 2,54145245  |
| 127 | 1240,234222 | 7,53211117  |
| 128 | 1240,264146 | 7,56293545  |
| 129 | 1244,134214 | 0,00049412  |
| 130 | 1252,244495 | 0,58454031  |
| 131 | 1252,32426  | 0,53309833  |
| 132 | 1253,014493 | 5,99208063  |
| 133 | 1253,054155 | 5,98771279  |
| 134 | 1253,534639 | 18,38981586 |
| 135 | 1253,864221 | 1,31111512  |
| 136 | 1282,754797 | 0,00416277  |
| 137 | 1282,794835 | 0,00429213  |
| 138 | 1285,32439  | 1,74723901  |
| 139 | 1367,194427 | 28,83900846 |
| 140 | 1367,234361 | 28,75706387 |
| 141 | 1368,854467 | 0,03124771  |
| 142 | 1373,904771 | 0,18529712  |
| 143 | 1374,294683 | 0,68995242  |
| 144 | 1374,45436  | 0,59806936  |
| 145 | 1378,714261 | 3,64552498  |
| 146 | 1378,764542 | 3,59609484  |
| 147 | 1379,784668 | 0,00631186  |

|     |             |             |
|-----|-------------|-------------|
| 148 | 1445,074494 | 35,39545213 |
| 149 | 1446,844491 | 4,1299262   |
| 150 | 1446,864954 | 4,06783167  |
| 151 | 1460,404725 | 84,11345595 |
| 152 | 1460,724277 | 18,98080661 |
| 153 | 1460,744478 | 17,55856077 |
| 154 | 1462,534515 | 13,77861876 |
| 155 | 1462,644888 | 28,32897745 |
| 156 | 1462,794443 | 28,29814233 |
| 157 | 1494,014819 | 17,32408055 |
| 158 | 1494,174578 | 17,16204644 |
| 159 | 1495,264237 | 0,19405445  |
| 160 | 1533,684625 | 18,46931883 |
| 161 | 1534,264968 | 8,72757359  |
| 162 | 1534,294575 | 8,76946627  |
| 163 | 1571,534044 | 126,7550039 |
| 164 | 1571,554747 | 129,386765  |
| 165 | 1571,564725 | 9,20835349  |
| 166 | 1627,544212 | 33,75735123 |
| 167 | 1631,144636 | 19,54183633 |
| 168 | 1631,184511 | 19,62436952 |
| 169 | 1633,714863 | 2,84466076  |
| 170 | 1633,824456 | 23,60971431 |
| 171 | 1633,86433  | 25,82103723 |
| 172 | 1644,534895 | 5,43972329  |
| 173 | 1644,614031 | 5,77100106  |
| 174 | 1645,114875 | 33,79759382 |
| 175 | 1675,684938 | 4,81840577  |
| 176 | 1675,814726 | 35,58922692 |
| 177 | 1676,014439 | 30,72452947 |
| 178 | 3212,674213 | 1,03876294  |
| 179 | 3212,814243 | 0,88580708  |
| 180 | 3212,834041 | 1,12264924  |
| 181 | 3213,874608 | 7,10153544  |
| 182 | 3213,944947 | 6,79535998  |
| 183 | 3213,994044 | 5,6296515   |
| 184 | 3214,364464 | 3,31382524  |
| 185 | 3214,494366 | 3,48308368  |
| 186 | 3214,534789 | 3,56239928  |

|     |             |             |
|-----|-------------|-------------|
| 187 | 3223,784668 | 10,27894621 |
| 188 | 3223,944414 | 10,53455857 |
| 189 | 3223,994494 | 8,58071689  |
| 190 | 3227,484175 | 7,56711855  |
| 191 | 3227,524078 | 10,21583139 |
| 192 | 3227,724465 | 3,12752335  |
| 193 | 3227,764996 | 6,78997192  |
| 194 | 3227,964418 | 17,61045927 |
| 195 | 3228,224038 | 6,20395365  |
| 196 | 3237,184607 | 6,96278835  |
| 197 | 3237,274888 | 6,42088818  |
| 198 | 3237,394405 | 6,69503898  |
| 199 | 3237,434306 | 4,09353688  |
| 200 | 3237,624095 | 13,00699994 |
| 201 | 3237,85403  | 5,06419353  |

**Table S2.** Calculated transition energies, wavelengths, and oscillator strengths for the quartet electronic states of **1**. Results were obtained using the RASSCF(13,3,3;5,5,7) protocol at the optimized Q<sub>0</sub> geometry, with relative energies referenced to the lowest-lying quartet state.

| State           | E, eV | E, nm | f        | Character |
|-----------------|-------|-------|----------|-----------|
| Q <sub>1</sub>  | 2,80  | 443   | 7,50E-05 | MC        |
| Q <sub>2</sub>  | 2,84  | 437   | 7,20E-05 | MC        |
| Q <sub>3</sub>  | 2,95  | 420   | 2,10E-05 | MC        |
| Q <sub>4</sub>  | 3,72  | 333   | 1,05E-02 | IL+LMCT   |
| Q <sub>5</sub>  | 3,88  | 319   | 8,00E-06 | MC        |
| Q <sub>6</sub>  | 3,96  | 313   | 2,50E-05 | MC        |
| Q <sub>7</sub>  | 4,01  | 309   | 1,07E-04 | MC        |
| Q <sub>8</sub>  | 4,36  | 284   | 6,22E-04 | MC        |
| Q <sub>9</sub>  | 4,50  | 276   | 1,01E-03 | LMCT      |
| Q <sub>10</sub> | 4,72  | 262   | 1,67E-02 | IL        |
| Q <sub>11</sub> | 4,74  | 261   | 3,24E-02 | IL+LMCT   |
| Q <sub>12</sub> | 4,99  | 249   | 1,78E-04 | LMCT      |
| Q <sub>13</sub> | 5,00  | 248   | 1,22E-03 | LMCT      |

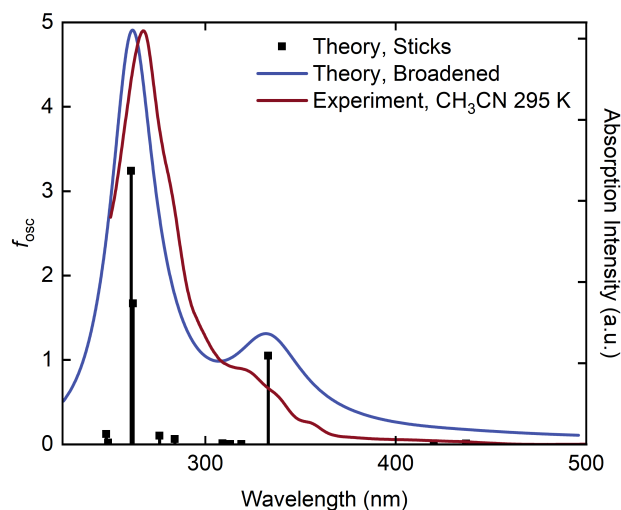

**Figure S13.** Theoretical absorption spectrum obtained from RASSCF vertical excitations from the ground state quartet, shown with 0.5 eV broadening (blue). The transitions are depicted as sticks with their corresponding oscillator strengths. This is superimposed with the experimental spectrum (red).

**Table S3.** Calculated transition energies, wavelengths and oscillator strengths and Configuration Interaction (CI) configurations for the doublet electronic states of **1**. Results were obtained using the RASSCF(13,3,3;5,5,7) protocol at the optimized  $D_1$  geometry, with relative energies referenced to the lowest-lying doublet state. The orbital configurations are denoted by their specific spatial orbital occupancies, where 2 indicates a doubly occupied orbital, 0 indicates an unoccupied orbital, u denotes a singly occupied orbital with an up-spin ( $\alpha$ ) electron, and **d** denotes a singly occupied orbital with a down-spin ( $\beta$ ) electron. Only configurations with the highest weights are shown for each state.

| State          | E, eV | E, nm | f | Main CI coefficients<br>( $\sigma_1$ )( $\sigma_2$ )( $\pi_1$ )( $\pi_2$ )( $\pi_3$ )<br>( <b>3d<sub>1</sub></b> )( <b>3d<sub>2</sub></b> )( <b>3d<sub>3</sub></b> )( <b>3d<sub>4</sub></b> )( <b>3d<sub>5</sub></b> )<br>( $\pi_1^*$ )( $\pi_2^*$ )( $\pi_3^*$ )( $\sigma^*$ )( <b>4d<sub>1</sub></b> )( <b>4d<sub>2</sub></b> )( <b>4d<sub>3</sub></b> ) | Character |
|----------------|-------|-------|---|------------------------------------------------------------------------------------------------------------------------------------------------------------------------------------------------------------------------------------------------------------------------------------------------------------------------------------------------------------|-----------|
| D <sub>2</sub> | 0,004 | -     | 0 | 2222220u000000000<br>2222202u000000000<br>22222uud000000000                                                                                                                                                                                                                                                                                                | MC        |
| D <sub>3</sub> | 0,06  | 19302 | 0 | 22222udu000000000<br>22222uud000000000                                                                                                                                                                                                                                                                                                                     | MC        |

|                 |      |       |          |                                                             |    |
|-----------------|------|-------|----------|-------------------------------------------------------------|----|
|                 |      |       |          | 222220u000000000                                            |    |
| D <sub>4</sub>  | 0,12 | 10198 | 0        | 22222u0000000000<br>222220u2000000000<br>22222u0200000000   | MC |
| D <sub>5</sub>  | 0,13 | 9778  | 0        | 22222uud000000000<br>22222udu000000000<br>22222u0200000000  | MC |
| D <sub>6</sub>  | 1,02 | 1213  | 2,20E-05 | 22222u2000000000<br>22222u0200000000<br>2222202u000000000   | MC |
| D <sub>7</sub>  | 1,04 | 1197  | 2,80E-05 | 2222202u000000000<br>2222220u000000000<br>22222u0200000000  | MC |
| D <sub>8</sub>  | 1,14 | 1088  | 7,00E-06 | 222220u200000000<br>222222u000000000<br>2222u2u000d000000   | MC |
| D <sub>9</sub>  | 2,14 | 579   | 2,70E-05 | 22222ud00u0000000<br>22222u0du00000000<br>222220udu00000000 | MC |
| D <sub>10</sub> | 2,40 | 517   | 1,50E-05 | 22222uu00d0000000<br>222220uud00000000<br>222220200u0000000 | MC |
| D <sub>11</sub> | 2,43 | 511   | 5,40E-05 | 222220uu0d0000000<br>22222u0u0d0000000<br>222220ud0u0000000 | MC |
| D <sub>12</sub> | 2,50 | 495   | 2,00E-06 | 22222u0ud00000000<br>222220uud00000000<br>222220200u0000000 | MC |
| D <sub>13</sub> | 2,53 | 490   | 1,00E-05 | 222220200u0000000<br>22222u0ud00000000                      | MC |

|                 |      |     |          |                                                                                  |       |
|-----------------|------|-----|----------|----------------------------------------------------------------------------------|-------|
|                 |      |     |          | 222220udu00000000                                                                |       |
| D <sub>14</sub> | 2,56 | 485 | 1,40E-05 | 222220ud0u00000000<br>22222020u00000000<br>22222uu0d00000000                     | MC    |
| D <sub>15</sub> | 2,60 | 477 | 2,00E-05 | 22222u0du00000000<br>22222002u00000000<br>22222200u00000000                      | MC    |
| D <sub>16</sub> | 2,81 | 441 | 1,10E-05 | 22222u0du00000000<br>22222ud00u00000000<br>222220200u00000000                    | MC    |
| D <sub>17</sub> | 2,83 | 438 | 2,40E-05 | 22222002u00000000<br>22222u0d0u00000000<br>22222ud0u00000000                     | MC    |
| D <sub>18</sub> | 3,26 | 380 | 1,10E-05 | 22222u0u0d00000000<br>222220uu0d00000000<br>22222002u00000000                    | MC    |
| D <sub>19</sub> | 3,29 | 377 | 0        | u2222duu00000000d<br>u2222udu0000000d<br>u2222uud0000000d                        | MLCT  |
| D <sub>20</sub> | 3,33 | 373 | 9,00E-06 | 22222u0ud00000000<br>22222uu00d0000000<br>222220uud00000000                      | MC    |
| D <sub>21</sub> | 3,36 | 369 | 1,21E-04 | 222u2duu000d00000<br>222u2udu000d00000<br>222u2uud000d00000<br>222220uu0d0000000 | IL+MC |
| D <sub>22</sub> | 3,37 | 368 | 8,00E-06 | 22222uu0d00000000<br>222220uud00000000<br>222220uu0d0000000                      | MC+IL |
| D <sub>23</sub> | 4,09 | 303 | 1,10E-05 | 222220020u00000000                                                               | MC    |

|                 |      |     |          |                                                             |    |
|-----------------|------|-----|----------|-------------------------------------------------------------|----|
|                 |      |     |          | 22222u0d0u0000000<br>22222ud00u0000000                      |    |
| D <sub>24</sub> | 4,14 | 299 | 9,00E-06 | 222220udu00000000<br>22222200u00000000<br>22222020u00000000 | MC |
| D <sub>25</sub> | 4,18 | 297 | 2,30E-05 | 22222020u00000000<br>22222u0du00000000<br>222220udu00000000 | MC |
| D <sub>26</sub> | 4,38 | 283 | 1,03E-04 | 22222ud0u00000000<br>22222u0d0u0000000<br>222220ud0u0000000 | MC |
| D <sub>27</sub> | 4,88 | 254 | 2,00E-06 | 222220u0du0000000<br>22222u00ud0000000<br>222220u0ud0000000 | MC |
| D <sub>28</sub> | 4,93 | 252 | 4,00E-06 | 222220u0du0000000<br>22222u00du0000000<br>22222u00ud0000000 | MC |
| D <sub>29</sub> | 4,93 | 251 | 2,00E-06 | 2222200udu0000000<br>2222200uud0000000<br>222220u0020000000 | MC |
| D <sub>30</sub> | 5,07 | 244 | 1,00E-05 | 222220u0020000000<br>22222u00020000000<br>2222200uud0000000 | MC |

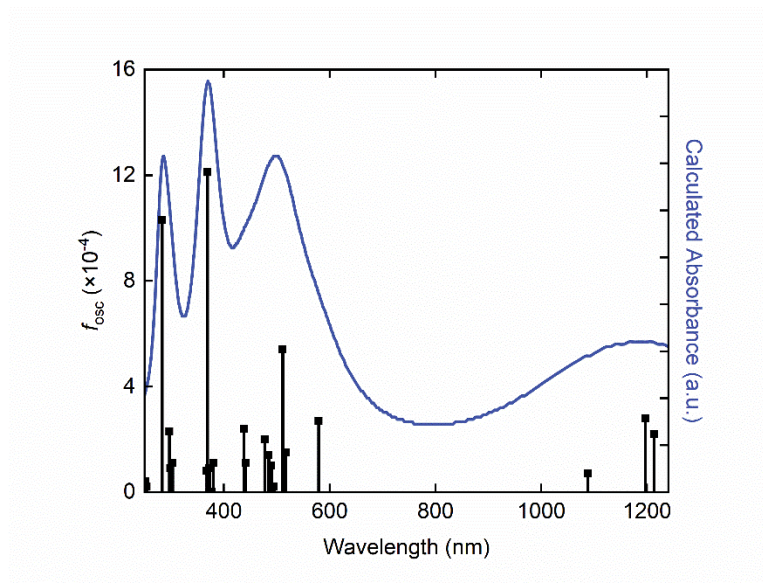

**Figure S14.** Theoretical absorption spectrum obtained from RASSCF vertical excitations from the doublet minima, shown with 0.5 eV broadening. The transitions are depicted as sticks with their corresponding oscillator strengths.

**Table S4.** Multi-state CASPT2 (MS-CASPT2) relative energies for the quartet and doublet electronic states of **1**. Calculations utilized an IPEA shift of 0.25 a.u. and an imaginary shift of 0.4 a.u. to ensure convergence and minimize intruder state effects. A CASSCF(3,5) wavefunction was employed, with state-averaging performed over five quartet states and four doublet states. All calculations were conducted at the optimized  $D_1$  geometry, with relative energies referenced to the doublet minima.

| State          | E, eV |
|----------------|-------|
| Q <sub>0</sub> | -1,97 |
| D <sub>1</sub> | 0,00  |
| D <sub>2</sub> | 0,03  |
| D <sub>3</sub> | 0,09  |
| D <sub>4</sub> | 0,13  |
| D <sub>5</sub> | 0,14  |
| Q <sub>2</sub> | 0,27  |
| Q <sub>3</sub> | 0,34  |
| Q <sub>4</sub> | 0,38  |

## 2. Synthesis and Characterization Data

### Synthesis of chromium(III) *tris*(1,10-phenanthroline) *tris*(tetrafluoroborate) (1)

The complex was prepared in a nitrogen-filled glovebox. In a 20 mL scintillation vial, a blue solution of  $[\text{Cr}(\text{CH}_3\text{CN})_4](\text{BF}_4)_2$  (100.0 mg, 0.256 mmol, 1 equiv) in 2 mL  $\text{CH}_3\text{CN}$  was prepared. The 1,10-phenanthroline ligand (143.3 mg, 0.795 mmol, 3.1 equiv) was dissolved in 4 mL of 1:1  $\text{CH}_3\text{CN}:\text{DCM}$  in a second 20 mL scintillation vial, then added to the metal solution, generating a dark brown or green mixture that was stirred for 1 hour. Solid  $\text{AgBF}_4$  was dissolved in minimal  $\text{CH}_3\text{CN}$  and added to the mixture, generating a yellow-orange solution that was stirred in the glovebox in the dark for 12 hours. The precipitated  $\text{Ag}^0$  solid waste was discarded after filtration through a PTFE syringe filter (0.25  $\mu\text{m}$ ), leaving a yellow solution. Initial purification was achieved by precipitation in 10 mL  $\text{Et}_2\text{O}$ , followed by filtration through a fine frit and washing twice with 2 mL  $\text{Et}_2\text{O}$ . Single crystals were obtained via  $\text{Et}_2\text{O}/\text{CH}_3\text{CN}$  vapor diffusion at room temperature, yielding 128.5 mg of yellow, needlelike crystals (59% yield).

HRMS (ESI):  $m/z$   $[\text{M} - 3 \text{BF}_4]^{3+}$ , calcd for  $[\text{CrC}_{36}\text{H}_{24}\text{N}_6]^{3+}$ : 197.3817; found: 197.3823 ( $\Delta = 3.0$  ppm). Elemental analysis (%): Calculated for  $\text{CrC}_{36}\text{H}_{24}\text{N}_6\text{B}_3\text{F}_{12} \cdot 0.5 \text{CH}_2\text{Cl}_2$ : C, 48.96; H, 2.81; N, 9.38. Found: C, 48.89; H, 3.05; N, 9.40.

### Synthesis of ruthenium(II) *tris*(1,10-phenanthroline)<sub>3</sub> *bis*(hexafluorophosphate) (2)

To a 100 mL round-bottom flask were added 131 mg of  $\text{RuCl}_3 \cdot 3\text{H}_2\text{O}$  (1 eq.), 275 mg (3 eq.) of 1,10-phenanthroline, 20 mL of ethylene glycol, and a magnetic stir bar. The resultant black mixture was refluxed under a nitrogen atmosphere for 3 h. The solution changed color from black to bright orange/red over the course of the reaction. The reaction solution was cooled to room temperature and added to a saturated, 150 mL solution of  $\text{NH}_4\text{PF}_6$  (aq.), forming a bright orange precipitate. The precipitate was collected by vacuum filtration and washed with 50 mL of ice-cold ethanol. The product was dried in a vacuum oven at 40 °C overnight, resulting in a light-orange powder (415 mg, 89% yield).

$^1\text{H}$  NMR (400 MHz,  $\text{CD}_3\text{CN}$ )  $\delta$  8.62 (d,  $J = 8.1$  Hz, 6H), 8.27 (s, 6H), 8.03 (d,  $J = 5.3$  Hz, 6H), 7.65 (dd,  $J = 8.4, 5.3$ , 6H).

### 3. UV-Visible Spectroscopy

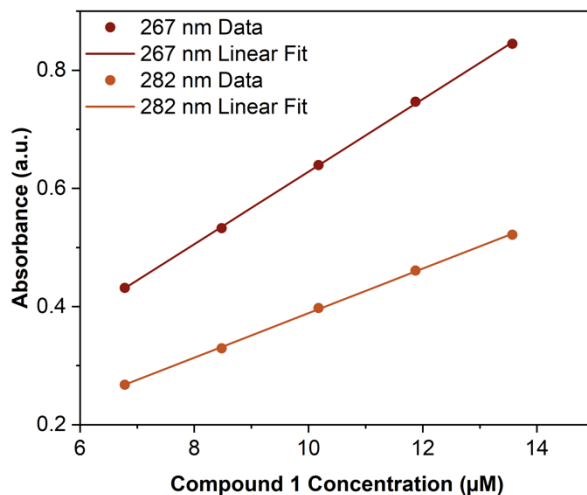

**Figure S15.** Molar extinction plots for compound **1** at 267 and 282 nm. Absorbance values were obtained at five concentrations (6.78 – 13.57  $\mu\text{M}$ ) in  $\text{CH}_3\text{CN}$  solvent. Linear fits yield molar absorption coefficients of  $6.13 \times 10^4 \text{ M}^{-1} \text{ cm}^{-1}$  (267 nm) and  $3.77 \times 10^4 \text{ M}^{-1} \text{ cm}^{-1}$  (282 nm), with  $R^2 > 0.9995$  in both cases.

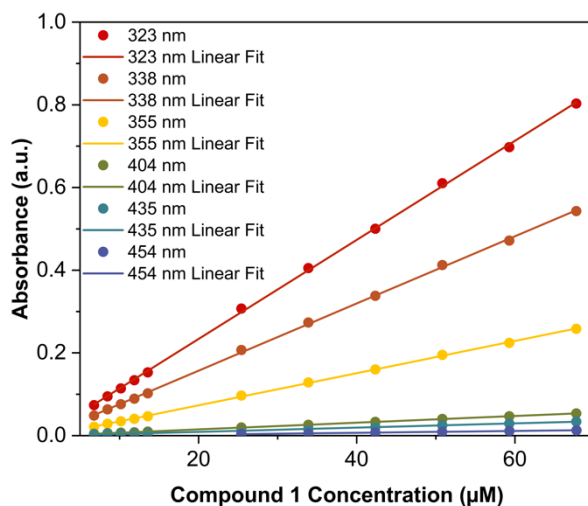

**Figure S16.** Molar extinction plots for compound **1** from 323 to 454 nm. Absorbance values for 323 nm to 435 nm were obtained at eleven concentrations (6.78 – 67.8  $\mu\text{M}$ ) in  $\text{CH}_3\text{CN}$  solvent. Linear fits yield molar absorption values of  $1.20 \times 10^4 \text{ M}^{-1} \text{ cm}^{-1}$  (323 nm),  $8.12 \times 10^3 \text{ M}^{-1} \text{ cm}^{-1}$  (338 nm),  $3.89 \times 10^3 \text{ M}^{-1} \text{ cm}^{-1}$  (355 nm),  $809 \text{ M}^{-1} \text{ cm}^{-1}$  (404 nm),  $513 \text{ M}^{-1} \text{ cm}^{-1}$  and (435 nm) with  $R^2 > 0.9995$  in all cases. Data for  $219 \text{ M}^{-1} \text{ cm}^{-1}$  (454 nm) was obtained at six concentrations (25.4 – 67.8  $\mu\text{M}$ ) in  $\text{CH}_3\text{CN}$  solvent with  $R^2 > 0.9994$ .

#### 4. Infrared Spectroscopy

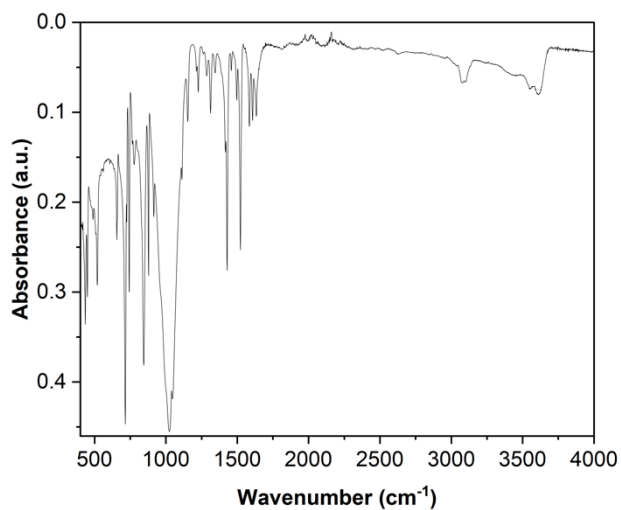

**Figure S17.** Full (400 to 4000  $\text{cm}^{-1}$ ) solid-state ATR-IR spectrum of **1**.

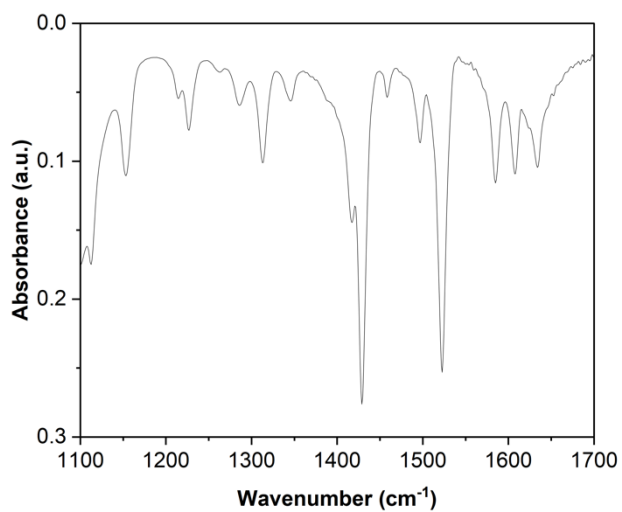

**Figure S18.** Partial (1100 to 1700  $\text{cm}^{-1}$ ) solid-state ATR-IR spectrum of **1**.

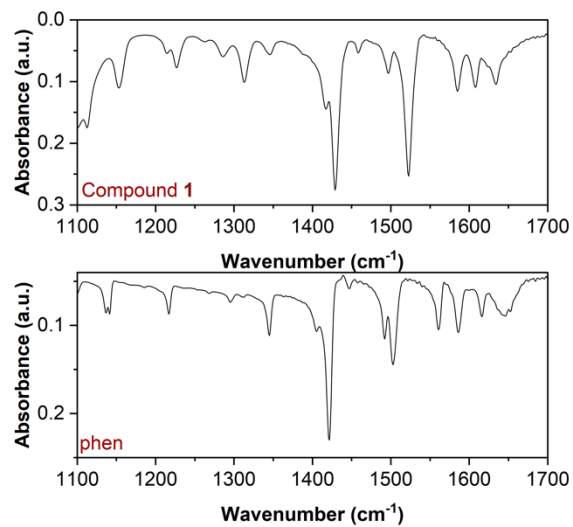

**Figure S19.** Comparison of ligand breathing modes between **1** (top) and the 1,10-phenanthroline ligand (bottom), recorded using solid-state ATR-IR.

## 5. Electrochemistry Measurements

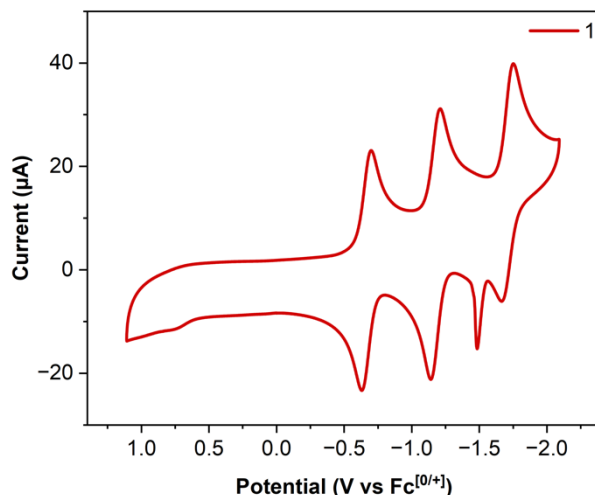

**Figure S20.** Cyclic voltammety data for **1** (0.1 mM) recorded in CH<sub>3</sub>CN with 0.25 M [<sup>n</sup>Bu<sub>4</sub>][PF<sub>6</sub>] supporting electrolyte at 100 mV/s scan rate. The sharp feature at -1.5 V vs Fc<sup>[0/+]</sup> in the anodic scan reflects electrode surface deposition, which disappears at higher scan rates.

**Table S6.** Electrochemical reduction potentials of **1**. Potentials measured at the half-wave potential ( $E_{1/2}$ ) and reported versus Fc<sup>[0/+]</sup>. Measurements recorded with 0.1 mM sample in 0.25 M [<sup>n</sup>Bu<sub>4</sub>][PF<sub>6</sub>] supporting electrolyte using CH<sub>3</sub>CN solvent. Measurements made at 100 mV/s scan rate. Reductions correspond to the following formal transitions: [CrL<sub>3</sub>]<sup>3+</sup>/[CrL<sub>2</sub>(L<sup>-</sup>)]<sup>2+</sup>, [CrL<sub>2</sub>(L<sup>-</sup>)]<sup>2+</sup>/[CrL(L<sup>-</sup>)<sub>2</sub>]<sup>1+</sup>, etc.

| Species  | $E(3+/2+)$ | $E(2+/1+)$ | $E(1+/0)$ | $E(0/1-)$ |
|----------|------------|------------|-----------|-----------|
| <b>1</b> | -0.67      | -1.18      | -1.71     | –         |

## 6. Transient Absorption Spectroscopy

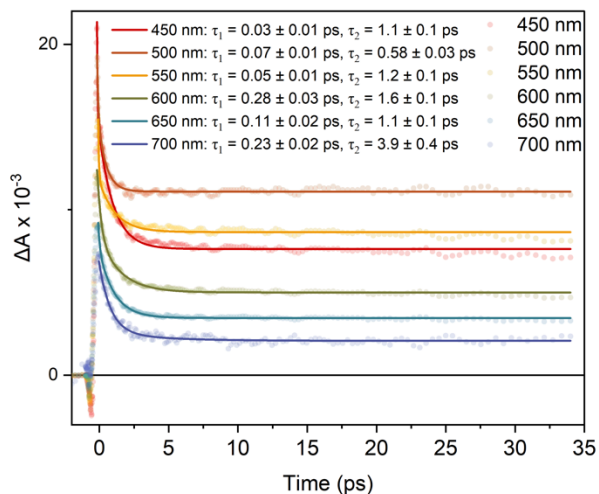

**Figure S21.** Kinetic traces of the transient absorption spectrum of **1** measured in CH<sub>3</sub>CN at RT.

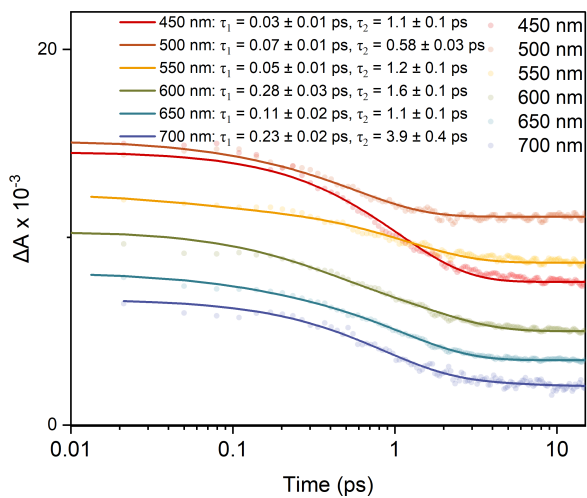

**Figure S22.** Kinetic traces of the transient absorption spectrum of **1** measured in CH<sub>3</sub>CN at RT. The logarithmic time axis shows the excited-state evolution up to 15 ps.

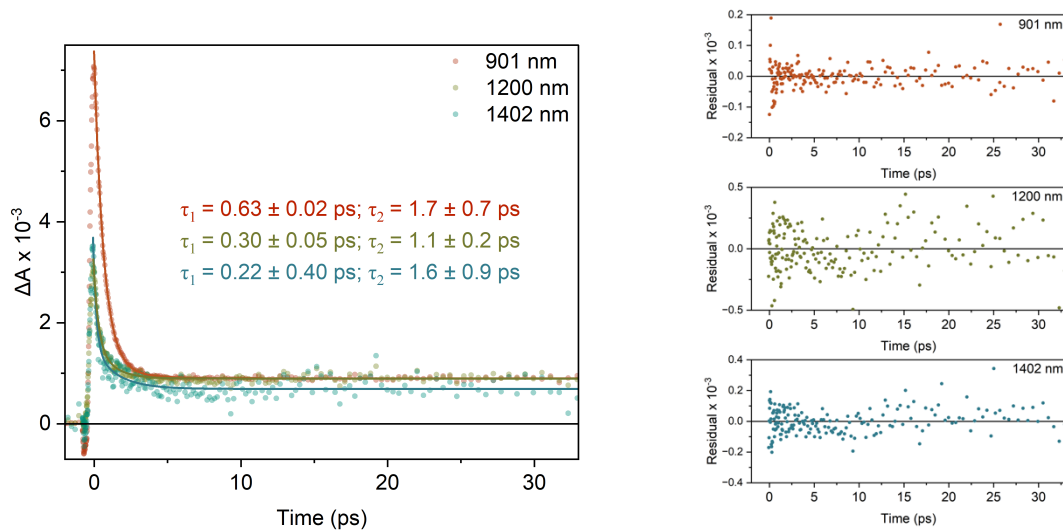

**Figure S23.** Kinetic traces and residuals of the transient absorption kinetics of **1** measured in CH<sub>3</sub>CN at RT.

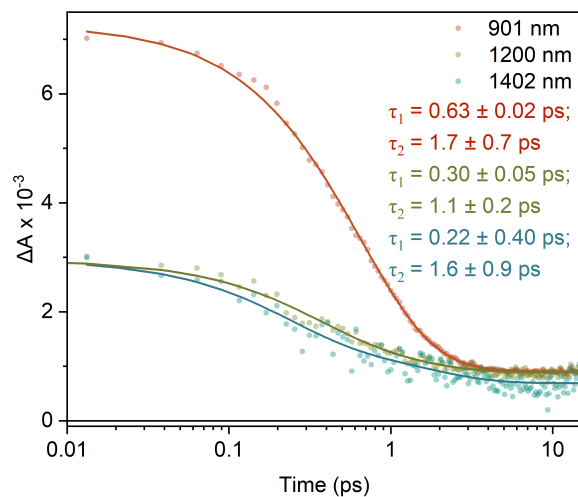

**Figure S24.** Kinetic traces and residuals of the transient absorption kinetics of **1** measured in CH<sub>3</sub>CN at RT. The logarithmic time axis shows the excited state evolution up to 15 ps.

## 7. Time-Resolved PL Emission

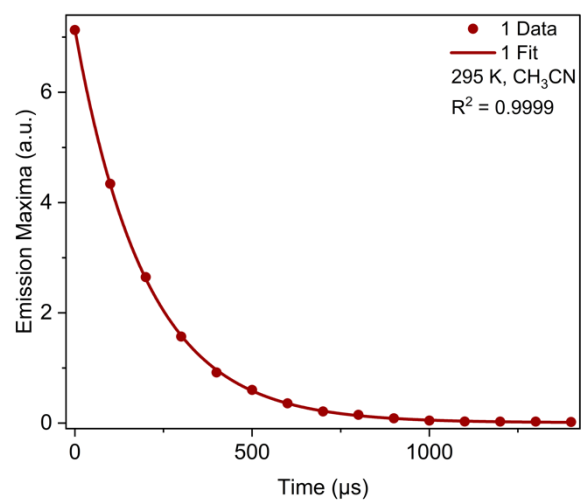

**Figure S25.** Nanosecond emission measurements of **1**, recorded from the <sup>2</sup>E PL emission feature (Abs = 0.496 a.u. at 355 nm, 295 K, CH<sub>3</sub>CN).

## 8. Optimized Structures

### Optimized Quartet Minima (Q<sub>0</sub>) of compound 1, Å

|    |           |           |           |
|----|-----------|-----------|-----------|
| Cr | 0.002311  | -0.008669 | 0.005767  |
| N  | 0.187471  | 1.749734  | 1.077650  |
| C  | 1.137868  | 2.576721  | 0.548073  |
| C  | 1.434246  | 3.848184  | 1.097229  |
| C  | 0.689430  | 4.248359  | 2.235045  |
| C  | -0.276648 | 3.400049  | 2.755686  |
| C  | -0.502299 | 2.152460  | 2.148303  |
| C  | 2.457716  | 4.650156  | 0.483126  |
| H  | 0.879004  | 5.218436  | 2.693214  |
| H  | -0.862514 | 3.684278  | 3.627020  |
| H  | -1.253654 | 1.470915  | 2.540181  |
| N  | 1.421877  | -1.030531 | 1.107019  |
| N  | -1.604623 | -0.699688 | 1.107406  |
| N  | 1.507608  | 0.882705  | -1.096960 |
| N  | -1.531375 | 0.830329  | -1.099843 |
| N  | 0.031979  | -1.775034 | -1.069285 |
| C  | 1.848066  | 2.110641  | -0.603791 |
| C  | 1.665315  | -2.276781 | 0.602137  |
| C  | 2.111592  | -0.613821 | 2.172508  |
| C  | -2.799705 | -0.284456 | 0.591137  |
| C  | -1.599908 | -1.479015 | 2.192258  |
| C  | 2.156952  | 0.406587  | -2.162858 |
| C  | -2.760287 | 0.538493  | -0.579031 |
| C  | -1.452033 | 1.602046  | -2.187431 |
| C  | 0.916542  | -2.677678 | -0.549852 |
| C  | -0.692145 | -2.114940 | -2.139154 |
| C  | 2.857021  | 2.914314  | -1.188777 |
| C  | 2.613637  | -3.159554 | 1.174020  |
| C  | 3.077103  | -1.420916 | 2.799204  |
| H  | 1.895845  | 0.385213  | 2.544067  |
| C  | -4.043840 | -0.634954 | 1.169885  |
| C  | -2.787785 | -1.879518 | 2.828736  |
| H  | -0.631186 | -1.794552 | 2.572735  |
| C  | 3.177179  | 1.132839  | -2.801735 |
| H  | 1.861953  | -0.574708 | -2.527177 |
| C  | -3.964629 | 1.012572  | -1.154056 |
| C  | -2.595461 | 2.119039  | -2.821109 |
| H  | -0.458117 | 1.817040  | -2.572915 |
| C  | 1.111433  | -3.963661 | -1.110397 |
| C  | -0.568147 | -3.372184 | -2.755722 |
| H  | -1.388081 | -1.373356 | -2.524166 |
| C  | 3.527288  | 2.385857  | -2.320528 |
| C  | 3.142410  | 4.200934  | -0.613505 |
| C  | 3.328574  | -2.692716 | 2.305566  |

|   |           |           |           |
|---|-----------|-----------|-----------|
| C | 2.797743  | -4.459043 | 0.586404  |
| H | 3.613730  | -1.037990 | 3.664468  |
| C | -4.008984 | -1.458239 | 2.323290  |
| C | -5.254189 | -0.144567 | 0.567964  |
| H | -2.733768 | -2.513645 | 3.710907  |
| H | 3.677485  | 0.703799  | -3.667152 |
| C | -3.851026 | 1.825580  | -2.309629 |
| C | -5.216133 | 0.648366  | -0.546862 |
| H | -2.481046 | 2.741462  | -3.705881 |
| C | 0.332189  | -4.296535 | -2.246772 |
| C | 2.074216  | -4.846251 | -0.508971 |
| H | -1.178714 | -3.603191 | -3.625819 |
| H | 4.312480  | 2.965406  | -2.804792 |
| H | 4.071147  | -3.333613 | 2.779585  |
| H | -4.939678 | -1.755822 | 2.805095  |
| H | -4.748634 | 2.215017  | -2.788753 |
| H | 0.444019  | -5.274543 | -2.713575 |
| H | 2.681711  | 5.626828  | 0.908685  |
| H | 3.916951  | 4.816151  | -1.068134 |
| H | 2.220562  | -5.833692 | -0.943261 |
| H | 3.526278  | -5.134837 | 1.030957  |
| H | -6.139349 | 1.015096  | -0.992166 |
| H | -6.208099 | -0.415612 | 1.017025  |

**Optimized Doublet Minima (D<sub>1</sub>) of compound 1, Å**

|    |           |           |           |
|----|-----------|-----------|-----------|
| Cr | 0.003890  | -0.007141 | 0.003400  |
| N  | 0.228565  | 1.795933  | 1.073930  |
| C  | 1.169805  | 2.618487  | 0.544565  |
| C  | 1.464411  | 3.864630  | 1.076747  |
| C  | 0.728879  | 4.274398  | 2.206981  |
| C  | -0.225561 | 3.448777  | 2.727376  |
| C  | -0.444052 | 2.210653  | 2.124107  |
| C  | 2.485376  | 4.672582  | 0.472083  |
| H  | 0.923046  | 5.234088  | 2.650829  |
| H  | -0.806466 | 3.729484  | 3.584384  |
| H  | -1.188508 | 1.548195  | 2.520881  |
| N  | 1.448304  | -1.082273 | 1.108321  |
| N  | -1.664016 | -0.690698 | 1.108971  |
| N  | 1.537322  | 0.938912  | -1.105465 |
| N  | -1.592960 | 0.824882  | -1.101964 |
| N  | 0.066970  | -1.820813 | -1.070118 |
| C  | 1.877177  | 2.155720  | -0.609768 |
| C  | 1.688810  | -2.319357 | 0.604192  |
| C  | 2.137359  | -0.690397 | 2.156102  |
| C  | -2.850622 | -0.282636 | 0.592199  |
| C  | -1.678737 | -1.461967 | 2.172658  |
| C  | 2.190162  | 0.487221  | -2.152262 |
| C  | -2.812107 | 0.537273  | -0.579746 |
| C  | -1.535447 | 1.591114  | -2.168046 |
| C  | 0.942552  | -2.718151 | -0.549467 |
| C  | -0.641837 | -2.175581 | -2.118346 |
| C  | 2.865194  | 2.948896  | -1.173243 |
| C  | 2.612840  | -3.191455 | 1.159478  |
| C  | 3.092442  | -1.491431 | 2.782025  |
| H  | 1.937409  | 0.293937  | 2.532735  |
| C  | -4.072643 | -0.625372 | 1.150650  |
| C  | -2.855315 | -1.866564 | 2.803131  |
| H  | -0.729921 | -1.780133 | 2.559170  |
| C  | 3.203695  | 1.206274  | -2.785967 |
| H  | 1.911561  | -0.480340 | -2.522392 |
| C  | -3.996296 | 0.998755  | -1.134267 |
| C  | -2.668539 | 2.109174  | -2.794799 |
| H  | -0.561466 | 1.812372  | -2.559304 |
| C  | 1.135320  | -3.980752 | -1.089350 |
| C  | -0.524924 | -3.424082 | -2.728645 |
| H  | -1.333685 | -1.454352 | -2.507796 |
| C  | 3.539398  | 2.436796  | -2.300156 |
| C  | 3.158250  | 4.232813  | -0.601933 |
| C  | 3.328752  | -2.741299 | 2.287135  |
| C  | 2.801549  | -4.491048 | 0.579741  |

|   |           |           |           |
|---|-----------|-----------|-----------|
| H | 3.621204  | -1.114748 | 3.635984  |
| C | -4.051023 | -1.446870 | 2.295758  |
| C | -5.286588 | -0.141844 | 0.556088  |
| H | -2.801464 | -2.495703 | 3.670326  |
| H | 3.698350  | 0.783581  | -3.638836 |
| C | -3.897907 | 1.811890  | -2.281233 |
| C | -5.249899 | 0.638360  | -0.534622 |
| H | -2.556122 | 2.727595  | -3.664079 |
| C | 0.364141  | -4.325092 | -2.217731 |
| C | 2.091857  | -4.870123 | -0.493744 |
| H | -1.130775 | -3.653676 | -3.583597 |
| H | 4.313935  | 3.017147  | -2.768088 |
| H | 4.056575  | -3.383900 | 2.748668  |
| H | -4.975286 | -1.738922 | 2.760667  |
| H | -4.790517 | 2.193503  | -2.743104 |
| H | 0.479731  | -5.294706 | -2.667389 |
| H | 2.701435  | 5.634320  | 0.898345  |
| H | 3.925050  | 4.834683  | -1.052593 |
| H | 2.229513  | -5.843511 | -0.926049 |
| H | 3.520033  | -5.154244 | 1.023897  |
| H | -6.157290 | 1.003384  | -0.978158 |
| H | -6.224017 | -0.415348 | 1.003024  |

## References

1. P. Müller and K. Brettel, "[Ru(bpy)<sub>3</sub>]<sup>2+</sup> as a reference in transient absorption spectroscopy: differential absorption coefficients for formation of the long-lived <sup>3</sup>MLCT excited state." *Photochem Photobiol Sci*, 2012, **11**, 632–636.
2. E. A. Juban, *The Ultrafast Dynamics of Chromium (III) Coordination Complexes*, University of California, Berkeley, 2006.
